# Supplementary material
Source: publisher figshare collection journal article supplement (https://tandf.figshare.com/ndownloader/files/21426333)
Supplement: Supplementary file 1 [file 21426333]

**Table S1** Views of male and female veterinary practitioners and associated professions (worldwide and per geographic region) on animal welfare**1**:

effect size and *P* value

**Geographic region**

**North South**

**Overall Europe Asia America America Africa Oceania**

**Welfare issues (1015) 2 (376) (330) (81) (26) (49) (152)**

**Effect size3 (*P* value4)**

- **Incorrect or inappropriate**

**nutrition** 0.085 (0.126) *0.180* (0.017) 0.061 (0.877) *0.150* (0.857) *0.286* (0.855) **0.411** (0.083) *0.207* (0.159)

- **Genetic or breed-related**

**issues** *0.161* **(0.000)** *0.127* (0.213) *0.153* (0.122) *0.273* (0.226) *0.298* (0.577) **0.408** (0.085) *0.185* (0.264)

- **Lack of routine prophylaxis** 0.047 (0.699) *0.213* (0.005) *0.146* (0.137) *0.277* (0.238) **0.340** (0.444) **0.394** (0.164) *0.247* (0.073)
- **Obesity** *0.161* **(0.000)** *0.259* **(0.000)** *0.101* (0.422) *0.290* (0.171) **0.418** (0.255) **0.301** (0.388) *0.147* (0.600)
- **Age-related issues** *0.109* (0.022) *0.136* (0.158) 0.059 (0.891) *0.288* (0.102) *0.281* (0.650) **0.313** (0.324) *0.219* (0.051)
- **Aggression**  *0.110* (0.018) *0.147* (0.143) *0.190* (0.011) *0.239* (0.378) *0.169* (0.929) *0.134* (0.927) *0.286* (0.014)
- **Separation-related behavior** 0.087 (0.110) *0.152* (0.081) *0.104* (0.493) **0.373** (0.030) **0.409** (0.207) *0.249* (0.474) *0.244* (0.044)
- **Lack of socialization** 0.092 (0.072) *0.153* (0.110) *0.150* (0.069) **0.352** (0.042) **0.524** (0.143) *0.201* (0.747) *0.202* (0.180)
- **Disobedience** *0.105* (0.024) *0.109* (0.420) *0.203* (0.004) *0.274* (0.253) **0.326** (0.283) *0.167* (0.883) *0.114* (0.778)
- **Inappropriate elimination** 0.093 (0.062) *0.114* (0.295) *0.107* (0.439) **0.341** (0.059) **0.328** (0.441) **0.322** (0.209) *0.130* (0.683)
- **Delay or refusal to euthanize** *0.100* (0.040) *0.150* (0.088) *0.124* (0.322) *0.188* (0.647) **0.396** (0.455) *0.220* (0.675) **0.349** **(0.001)**
- **Lack of knowledge** 0.058 (0.502) 0.099 (0.505) *0.123* (0.280) *0.266* (0.182) **0.500** (0.161) *0.244* (0.532) *0.108* (0.618)
- **Animal abuse** 0.074 (0.240) *0.184* (0.011) 0.100 (0.513) **0.320** (0.098) **0.535** (0.076) **0.342** (0.351) **0.360** **(0.001)**
- **Non-compliance** *0.103* (0.034) *0.132* (0.196) *0.151* (0.096) 0.084 (0.897) **0.458** (0.285) **0.301** (0.317) *0.298* (0.009)
- **Anthropomorphism**  0.068 (0.339) 0.099 (0.545) 0.035 (0.985) 0.095 (0.944) *0.218* (1.000) *0.198* (0.773) *0.220* (0.139)

**[Table S1, continued]**

- **Confinement / lack of**

**exercise** 0.064 (0.410) 0.072 (0.802) *0.132* (0.184) *0.249* (0.311) **0.365** (0.198) *0.184* (0.820) *0.265* (0.026)

- **Refusal to treat**  *0.122* (0.005) *0.131* (0.216) *0.131* (0.188) *0.186* (0.685) **0.556** (0.124) **0.320** (0.232) **0.351** **(0.001)**
- **Treatment by non-qualified**

**persons** 0.060 (0.444) *0.155* (0.089) *0.134* (0.170) *0.182* (0.689) **0.466** (0.246) **0.427** (0.052) *0.207* (0.210)

- **Convenience euthanasia** *0.112* (0.015) *0.130* (0.207) *0.130* (0.245) *0.164* (0.753) *0.253* (0.903) *0.284* (0.499) *0.290* (0.017)
- **Uncontrolled or over-breeding** *0.145* **(0.000)** *0.148* (0.109) *0.169* (0.058) **0.320** (0.048) *0.236* (1.000) **0.363** (0.092) **0.303** (0.007)

**1** This table is based on questions 6-9 of the quenstionnaire (see Appendix).

**2** Number of respondents is given in parentheses.

**3** Effect size *w* was dervied from Cramer’s *V*. Zero or nearly zero effect are indicated in normal fonts, small effects in *italics,* moderate effects in **bold** and large effects in **bold** and **underlined.**

**4** *P* value in the Likelihood ratio test (G-test of goodness-of-fit) is given in parentheses. Significant differences (*P* < 0.002561) between male and female respondents are indicated in **bold**.

**Table S2** Educational background of respondents per geographic region and country

**Geographic region**

- ***Country***
- Universities, institutes, academies, colleges and schools awarding veterinary **Number of**

and allied degrees **respondents**

**Europe**

- *Russian Federation*
- Saint Petersburg State Academy of Veterinary Medicine 81
- Moscow State Academy of Veterinary Medicine and Biotechnology 43
- Peoples' Friendship University of Russia Moscow 6
- Omsk State Agrarian University – Institute of Veterinary Medicine 4
- South Ural State University 4
- Ural Federal University 4
- Voronezh State Agrarian University 4
- Donskoy State Agrarian University 3
- Kuban State Agrarian University 3
- Moscow State University of Food Production 3
- Novgorod State Agricultural Academy 3
- Novosibirsk State Agricultural University 3
- Ogarev Mordovia State University 3
- Perm State Agricultural Academy 3
- Vitebsk State Academy of Veterinary Medicine 3
- Volgograd State Agricultural University 3
- Crimean Agrotechnological University 2
- Irkutsk State Agricultural Academy 2
- Bashkir State Agrarian University 1
- Ivanovo State University 1
- Krasnoyarsk State Agrarian University 1
- Kursk State Agricultural Academy 1
- Orel State Agrarian University 1
- Orenburg State Agrarian University 1
- Samara National Research University 1
- Saratov State Agrarian University 1
- Stavropol State Agrarian University 1
- Tomsk Agricultural Institute 1
- Tyumen State Agriculture Academy 1
- *Netherlands*
- Utrecht University – Faculty of Veterinary Medicine 66
- Leidse Onderwijsinstellingen – Veterinary Technician 1
- Van Hall Larenstein University of Applied Sciences 1

**[Table S2, continued]**

- *Slovakia*
- University of Veterinary Medicine in Košice 22
- *United Kingdom of Great Britain and Northern Ireland*
- University of London – Royal Veterinary College 14
- University of Edinburgh – Royal (Dick) School of Veterinary Studies 12
- University of Bristol – Faculty of Medical and Veterinary Sciences 11
- University of Glasgow – School of Veterinary Medicine 11
- University of Liverpool – School of Veterinary Science 6
- University of Cambridge – Veterinary School 5
- University of Nottingham – School of Veterinary Medicine and Science 2
- Lite Limited 1
- Myerscough School of Veterinary Nursing 1
- Scotland's Rural College – Scottish Agricultural College 1
- *Belgium*
- University of Ghent – Faculty of Veterinary Medicine 10
- University of Liège – Faculty of Veterinary Medicine 3
- *Spain*
- Autonomous University of Barcelona – Veterinary Faculty 10
- University of Santiago de Compostela – Faculty of Veterinary Medicine 7
- Complutense University of Madrid – Veterinary Faculty 6
- University of Zaragoza – Veterinary Faculty 4
- University of Las Palmas de Gran Canaria – Veterinary Faculty 2
- University of León – Veterinary Faculty 1
- University of Murcia – Veterinary Faculty 1
- *Greece*
- Aristotle University of Thessaloniki – Faculty of Veterinary Medicine 8
- *Ukraine*
- Kharkiv State Zootechnical-Veterinary Academy 7
- National Agricultural University of Ukraine – Faculty of Veterinary Science 3
- Lviv National Agrarian University 2
- National University of Bioresources and Nature Kiev 2
- Bilotserkivska National Agrarian University 1
- Lugansk National Agrarian University 1
- Zhytomyr National Agroecological University 1
- *Estonia*
- Estonian University of Life Sciences – Institute of Veterinary Medicine and Animal

Sciences 6

- *Hungary*
- Szent Istvan University, Budapest – Faculty of Veterinary Science 6
- *Italy*
- University of Parma – Faculty of Veterinary Medicine 6

**[Table S2, continued]**

- University of Milan – Faculty of Veterinary Medicine 3
- University of Bologna - Faculty of Veterinary Medicine 2
- University of Pisa –Faculty of Veterinary Medicine 2
- University of Padua – Faculty of Veterinary Medicine 1
- University of Teramo – Faculty of Veterinary Medicine 1
- University of Turin – Faculty of Veterinary Medicine 1
- *Germany*
- Justus Liebig University Giessen - Faculty of Veterinary Medicine 4
- University of Veterinary Medicine Hanover 3
- Free University of Berlin – Department of Veterinary Medicine 2
- Ludwig Maximilian University of Munich – Faculty of Veterinary Medicine 2
- *Ireland*
- University College Dublin – School of Veterinary Medicine 3
- *Slovenia*
- University of Ljubljana – Faculty of Veterinary Medicine 3
- *Belarus*
- Grodno State Agrarian University – Faculty of Veterinary Medicine 2
- *Czech Republic*
- University of Veterinary and Pharmaceutical Sciences, Brno 2
- *France*
- National Veterinary School of Alfort 2
- *Moldavia*
- Agricultural State University of Moldova – Faculty of Veterinary Medicine 2
- *Poland*
- Warsaw University of Life Sciences – Faculty of Veterinary Medicine 2
- University of Warmia and Mazury – Faculty of Veterinary Medicine 1
- Wroclaw University of Environmental and Life Sciences – Faculty of Veterinary

Medicine 1

- *Portugal*
- Technical University of Lisbon – Faculty of Veterinary Medicine 2
- *Romania*
- Bucharest Spiru Haret University – Faculty of Veterinary Medicine 2
- Banat University of Agricultural Sciences and Veterinary Medicine 1
- Carol Davila University of Medicine and Pharmacy 1
- University of Agricultural Sciences and Veterinary Medicine of Cluj-Napoca – Faculty

of Veterinary Medicine 1

- *Albania*
- Agricultural University of Tirana – Faculty of Veterinary Medicine 1
- *Austria*
- University of Veterinary Medicine Vienna 1

**[Table S2, continued]**

- *Croatia*
- University of Zagreb – Faculty of Veterinary Medicine 1
- *Denmark*
- University of Copenhagen – Faculty of Health and Medical Sciences 1
- *Latvia*
- Latvia University of Life Sciences and Technologies – Faculty of Veterinary

Medicine 1

**Asia**

- *Israel*
- Hebrew University of Jerusalem – Koret School of Veterinary Medicine 92
- *China (People’s Republic of)*
- China Agricultural University – College of Veterinary Medicine 9
- Nanjing Agricultural University – College of Veterinary Medicine 6
- Northwest Agriculture and Forestry University – College of Veterinary Medicine 5
- Northeast Agricultural University – College of Veterinary Medicine 3
- Sichuan Agriculture University – Veterinary Medicine College 3
- South China Agricultural University – College of Veterinary Medicine 3
- Jilin University – College of Animal Science and Veterinary Medicine 2
- Shanxi Agricultural University – Faculty of Veterinary Medicine 2
- Agricultural University of Hebei – College of Veterinary Medicine 1
- Huazhong Agricultural University – College of Veterinary Medicine 1
- National Chung Hsinhg University – College of Veterinary Medicine 1
- Qinghai University –Academy of Animal Science and Veterinary Medicine 1
- Yangzhou University – School of Veterinary Science 1
- *Malaysia*
- Putra University Malaysia – Faculty of Veterinary Medicine 21
- University Malaysia Kelantan – Malaysia Faculty of Veterinary Medicine 3
- *Indonesia*
- Bogor Agricultural University – Faculty of Veterinary Medicine 15
- Airlangga University - Faculty of Veterinary Medicine 7
- Syiah Kuala University - Faculty of Veterinary Medicine 1
- Udayana University - Faculty of Veterinary Medicine 1
- *Vietnam*
- Ho Chi Minh City University of Agriculture and Forestry - Faculty of Veterinary

Breeding 12

- Can Tho University 2
- Tay Nguyen University – Faculty of Animal Science and Veterinary Medicine 2
- Quang Ninh University of Industry 1

**[Table S2, continued]**

- *Philippines*
- University of the Philippines Los Baños – College of Veterinary Medicine 9
- Central Luzon State University – College of Veterinary Science and Medicine 2
- De La Salle-Araneta University – College of Veterinary Medicine and Agricultural

Sciences 2

- Aklan State University – School of Veterinary Medicine 1
- Southwestern University PHINMA – School of Veterinary Medicine 1
- *Sri Lanka*
- University of Peradeniya – Faculty of Veterinary Medicine and Animal Science 7
- *India*
- G. B. Pant University of Agriculture and Technology – College of Veterinary and

Animal Sciences 2

- Tamil Nadu Veterinary and Animal Sciences University – Madras Veterinary College 2
- Assam Agricultural University - College of Veterinary Science 1
- College of Veterinary and Animal Science Navania, Vallabhnagar, Udaipur 1
- College of Veterinary Science & Animal Husbandry Mathura, Utter Pradesh 1
- Karnataka Veterinary, Animal and Fisheries Sciences University – Veterinary College, Bangalore 1
- Maharashtra Animal and Fishery Sciences University – Bombay Veterinary College 1
- Punjab Agricultural University 1
- West Bengal University of Animal and Fishery Sciences – Faculty of Veterinary

Science 1

- *Iran (Islamic Republic of)*
- Karaj Islamic Azad University – Faculty of Veterinary Science 1
- University of Tehran – Faculty of Veterinary Medicine 1
- *Thailand*
- Chiang Mai University – Faculty of Veterinary Medicine 1
- Kasetsart University – Faculty of Veterinary Medicine 1
- *Mongolia*
- Mongolian State University of Agriculture 1
- *Myanmar*
- University of Veterinary Science, Yezin, Pyinmam – Institute of Animal Husbandry

and Veterinary Science 1

- *Nepal*
- Tribhuvan University's Institute of Agriculture and Animal Science 1
- *Taiwan*
- National Pingtung University of Science and Technology – College of Veterinary

Medicine 1

- *Uzbekistan*
- Tashkent State Agrarian University 1

**[Table S2, continued]**

**North America**

- *Canada*
- University of Saskatchewan – Western College of Veterinary Medicine 9
- University of Guelph – Ontario Veterinary College 8
- Olds College 3
- Lakeland College – Animal Health Technology 2
- Northern Alberta Institute of Technology 2
- University of Prince Edward Island – Atlantic Veterinary College 2
- Centralia College of Agricultural Technology 1
- Thompson Rivers University – Animal Health Technology 1
- *United States of America*
- University of California – Davis School of Veterinary Medicine 8
- Cornell University – College of Veterinary Medicine 5
- University of Florida – College of Veterinary Medicine 4
- University of Pennsylvania – School of Veterinary Medicine 4
- Michigan State University – College of Veterinary Medicine 3
- Texas A&M College of Veterinary Medicine & Biomedical Sciences 3
- Tuskegee University – School of Veterinary Medicine 3
- University of Illinois at Urbana-Champaign – College of Veterinary Medicine 3
- University of Minnesota – College of Veterinary Medicine 3
- Louisiana State University – School of Veterinary Medicine 2
- North Carolina State University – College of Veterinary Medicine 2
- Ohio State University – College of Veterinary Medicine 2
- Ross University – School of Veterinary Medicine 2
- Tufts University Cummings School of Veterinary Medicine 2
- University of Missouri – College of Veterinary Medicine 2
- Washington State University – College of Veterinary Medicine 2
- Auburn University – College of Veterinary Medicine 1
- Mississippi State University – College of Veterinary Medicine 1
- University of Tennessee – College of Veterinary Medicine 1
- University of Wisconsin-Madison – School of Veterinary Medicine 1
- Western University of Health Sciences – College of Veterinary Medicine 1
- *Cuba*
- University of Granma 1
- *Trinidad and Tobago (Republic of)*
- University of the West Indies, St. Augustine Campus – School of Veterinary Medicine 1
- *Mexico*
- Chapingo Autonomous University 1

**[Table S2, continued]**

**South America**

- *Argentina*
- University of Buenos Aires – Faculty of Veterinary Sciences 12
- University of El Salvador – Veterinary Medicine Course 1
- *Brazil*
- University of São Paulo – Faculty of Veterinary Medicine 2
- Federal University of Goiás – Veterinary and Husbandry School 1
- Paulista Júlio State University of Mesquita Filho, Botucatu campus Faculty of

Veterinary Medicine and Husbandry 1

- Rural Federal University of Rio de Janeiro – College of Agriculture and Veterinary

Medicine 1

- *Chili*
- University of Chile – Faculty of Veterinary Sciences and Livestock 2
- *Colombia*
- Saint Martin University – Faculty of Veterinary Medicine 2
- University of Caldas – School of Veterinary Sciences 1
- *Ecuador*
- Central University of Ecuador – Faculty of Veterinary Medicine and Husbandry 2
- Agricultural University of Ecuador – Faculty of Veterinary Medicine and Husbandry 1
- *Honduras*
- National Autonomous University of Honduras – School of Veterinary Medicine 1
- *Venezuela (Bolivarian Republic of)*
- Central University of Venezuela – Faculty of Veterinary Science 1

**Africa**

- *South Africa*
- University of Pretoria – Faculty of Veterinary Science 28
- *United Republic of Tanzania*
- Sokoine University of Agriculture – Faculty of Veterinary Medicine 8
- *Nigeria*
- University of Ibadan – Faculty of Veterinary Medicine 3
- *Zambia*
- University of Zambia – Samora Machel School of Veterinary Medicine 3
- *Tunesia*
- National School of Veterinary Medicine of Sidi Thabet 2
- *Morocco*
- Agronomic and Veterinary Institute of Hassan II Polytechnic Center of Earth

and Life Sciences 1

- *Senegal*
- Inter-State School of Veterinary Sciences and Medicine of Dakar 1

**[Table S2, continued]**

**Oceania**

- *Australia*
- University of Sydney – Faculty of Veterinary Science 48
- University of Melbourne – Faculty of Veterinary Science 40
- University of Queensland – School of Veterinary Science 39
- Murdoch University – School of Veterinary and Biometrical Sciences 27
- Charles Sturt University – School of Animal and Veterinary Sciences 3
- University of Adelaide – School of Animal and Veterinary Sciences 3
- James Cook University – School of Veterinary and Biomedical Sciences 2
- Monash University – Faculty of Medicine, Nursing and Health Sciences 1
- *New Zealand*
- Massey University – Faculty of Veterinary Science 12

**Total** 1052
